# Supplementary material for: Natural resistance to ascorbic acid induced oxidative stress is mainly mediated by catalase activity in human cancer cells and catalase-silencing sensitizes to oxidative stress
Source: Springer Nature journal article supplement (doi:10.1186/1472-6882-12-61), 2012-05-02

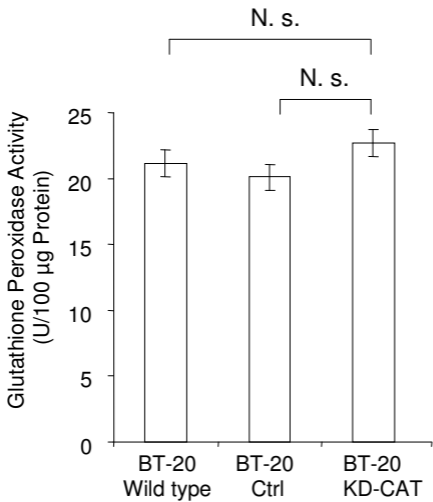

Supplement: 12906_2011_1044_MOESM1_ESM.pdf [file 12906_2011_1044_MOESM1_ESM.pdf]
