# Supplementary figures and images for: Natural resistance to ascorbic acid induced oxidative stress is mainly mediated by catalase activity in human cancer cells and catalase-silencing sensitizes to oxidative stress
Source: Springer Nature journal article supplement (doi:10.1186/1472-6882-12-61), 2012-05-02

**A**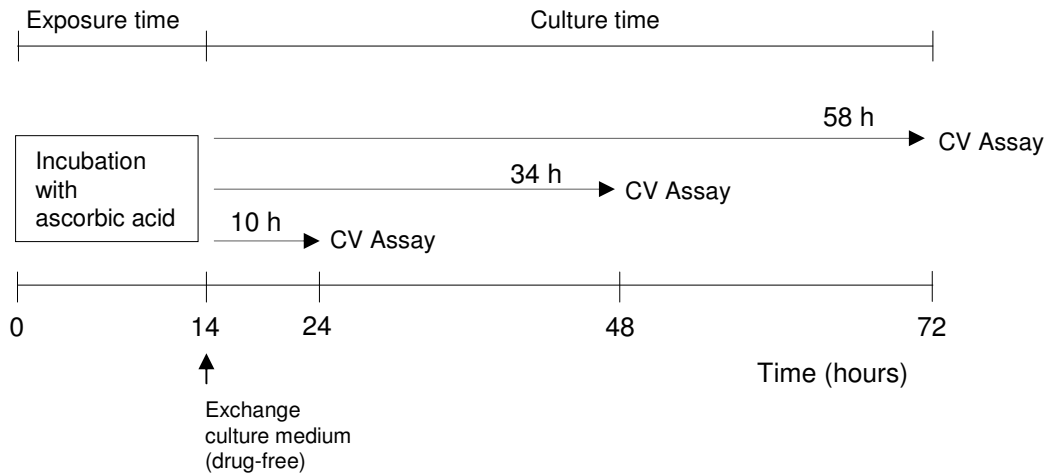**B**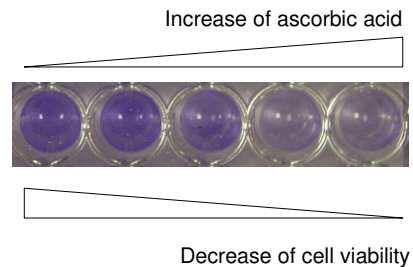

Supplement: 12906_2011_1044_MOESM2_ESM.pdf [file 12906_2011_1044_MOESM2_ESM.pdf]

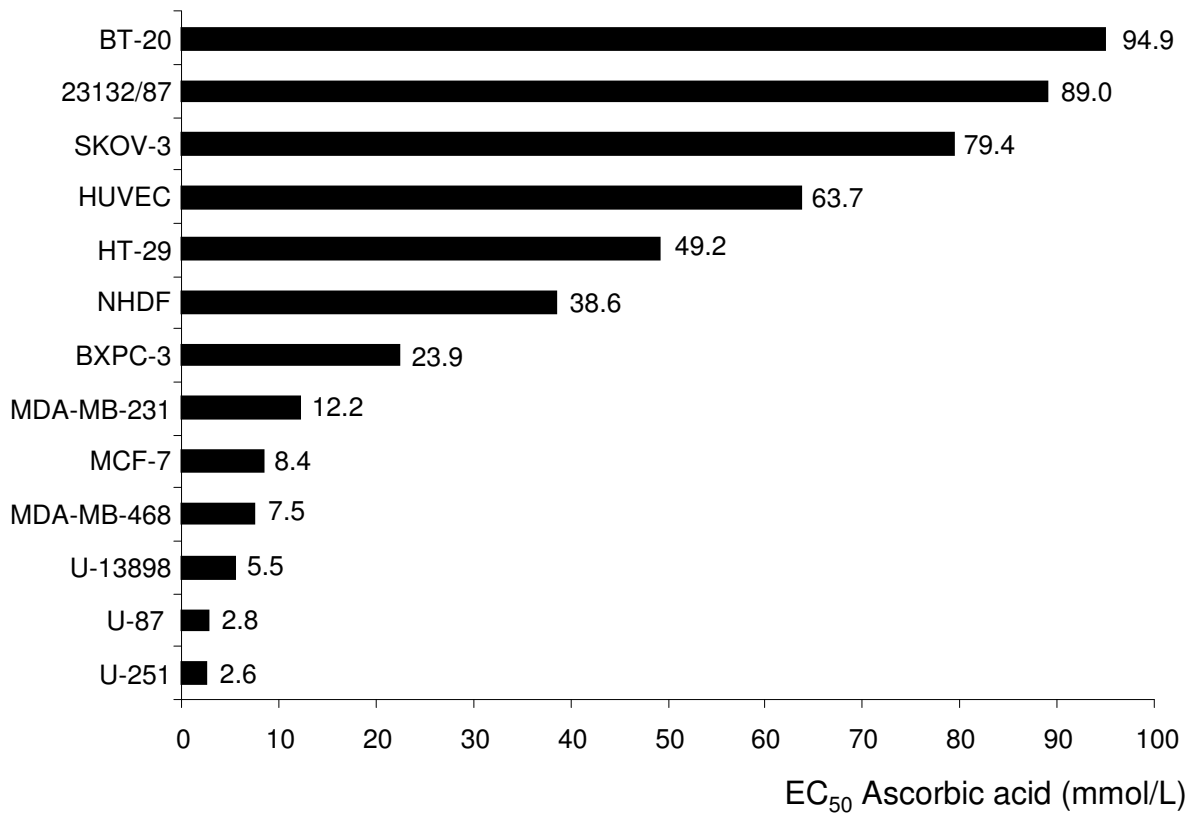

Supplement: 12906_2011_1044_MOESM3_ESM.pdf [file 12906_2011_1044_MOESM3_ESM.pdf]

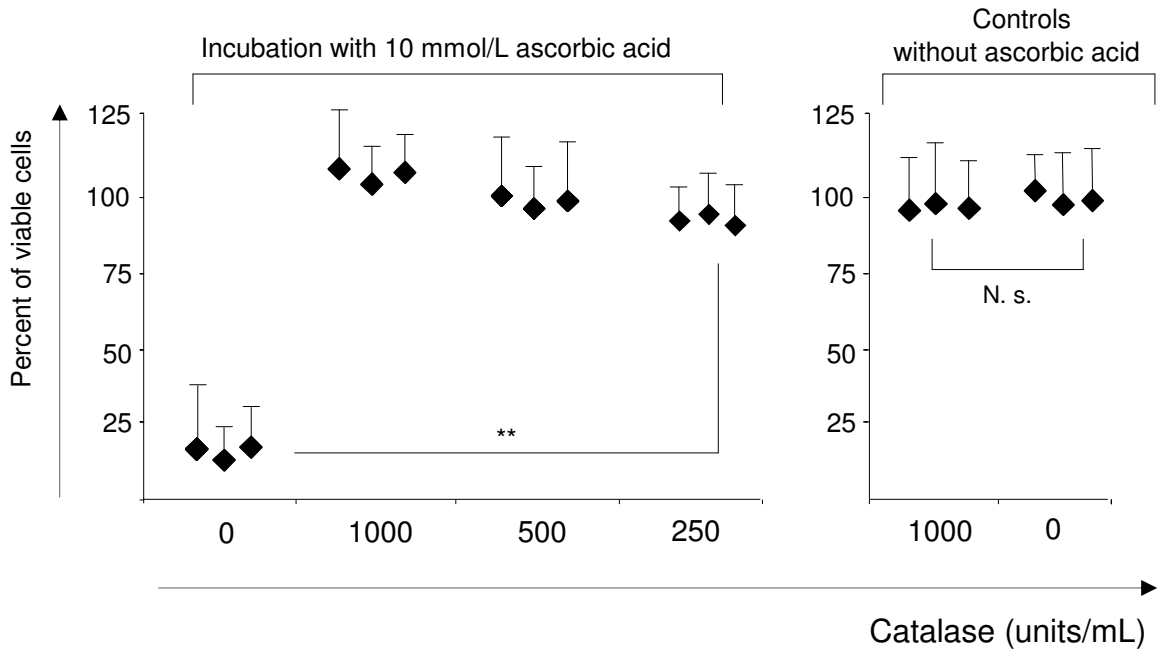

Supplement: 12906_2011_1044_MOESM4_ESM.pdf [file 12906_2011_1044_MOESM4_ESM.pdf]

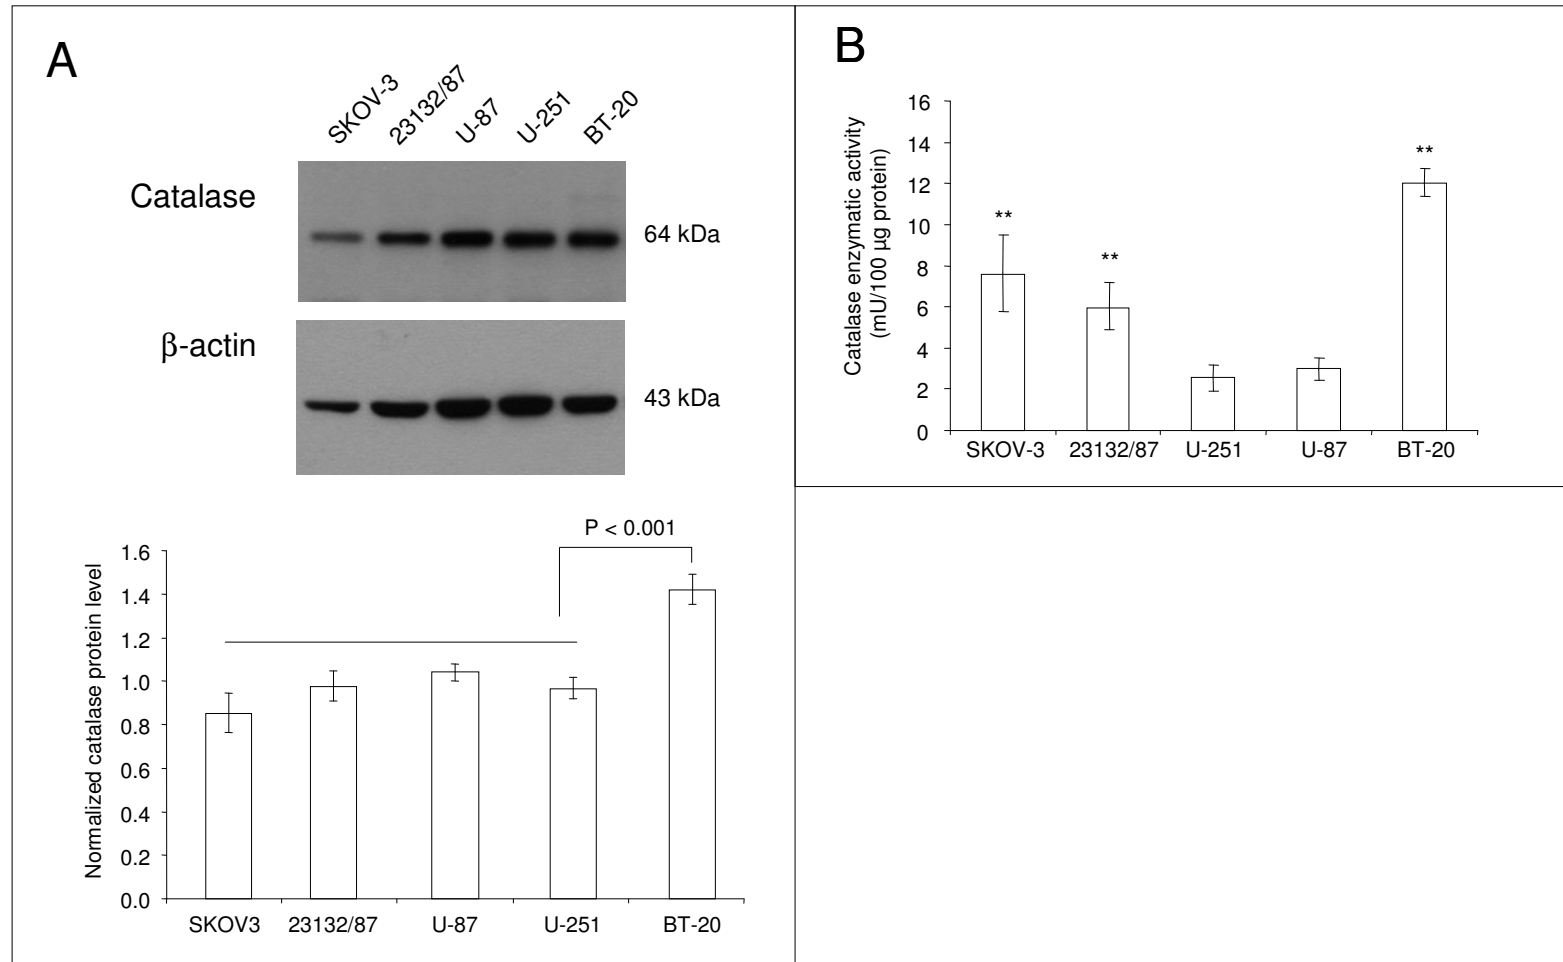

Fig. 4

Supplement: 12906_2011_1044_MOESM5_ESM.pdf [file 12906_2011_1044_MOESM5_ESM.pdf]

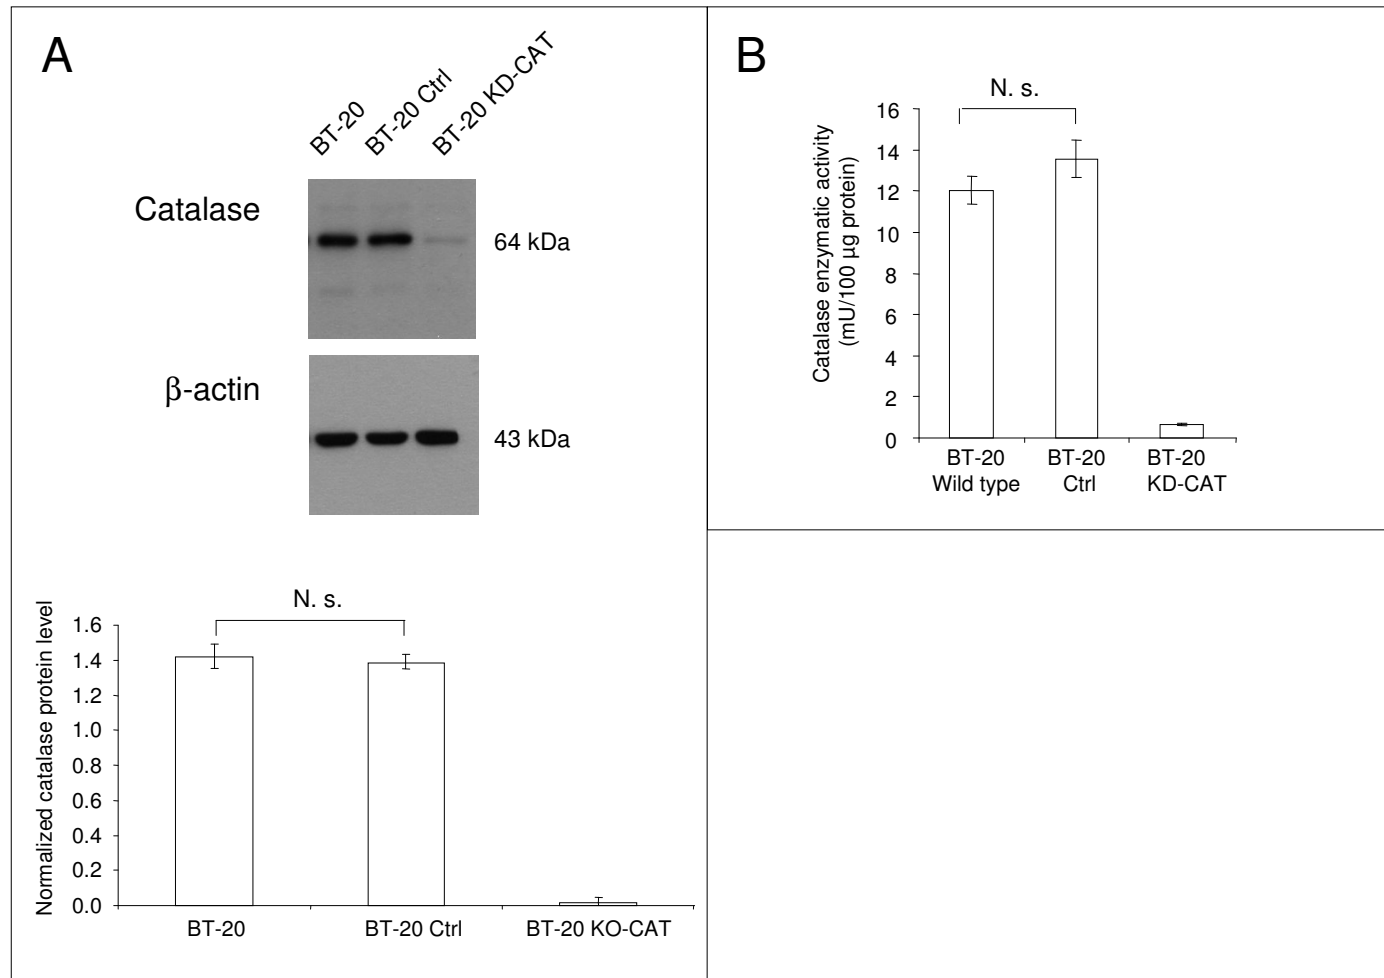

Fig. 5

Supplement: 12906_2011_1044_MOESM6_ESM.pdf [file 12906_2011_1044_MOESM6_ESM.pdf]

Culture time (Fig. 1)

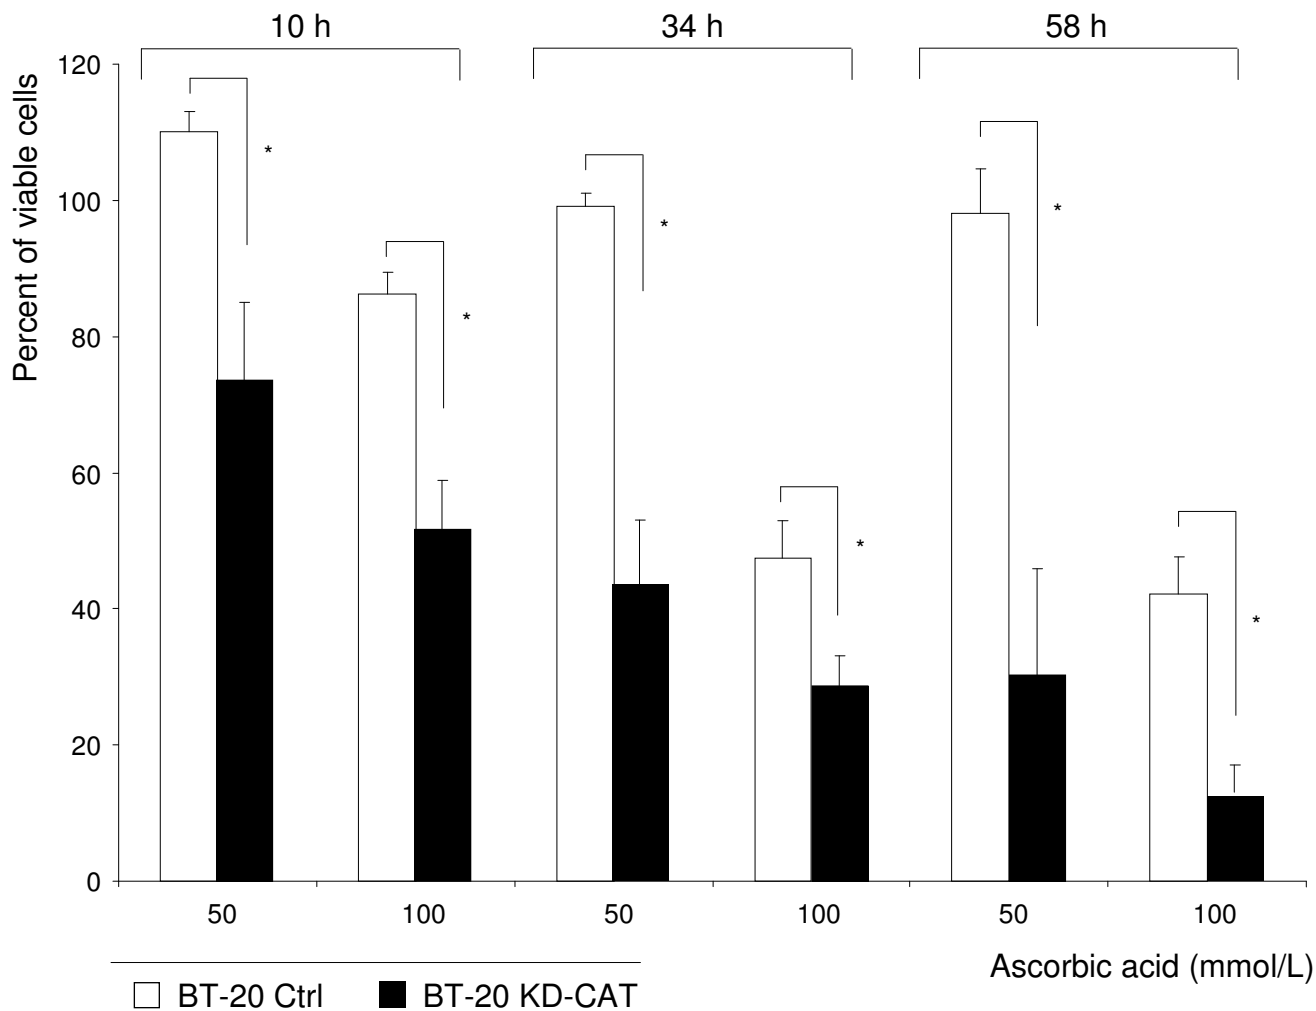

Supplement: 12906_2011_1044_MOESM7_ESM.pdf [file 12906_2011_1044_MOESM7_ESM.pdf]

Incubation (14h) with ascorbic acid and additional culture of 10h (Fig. 1)

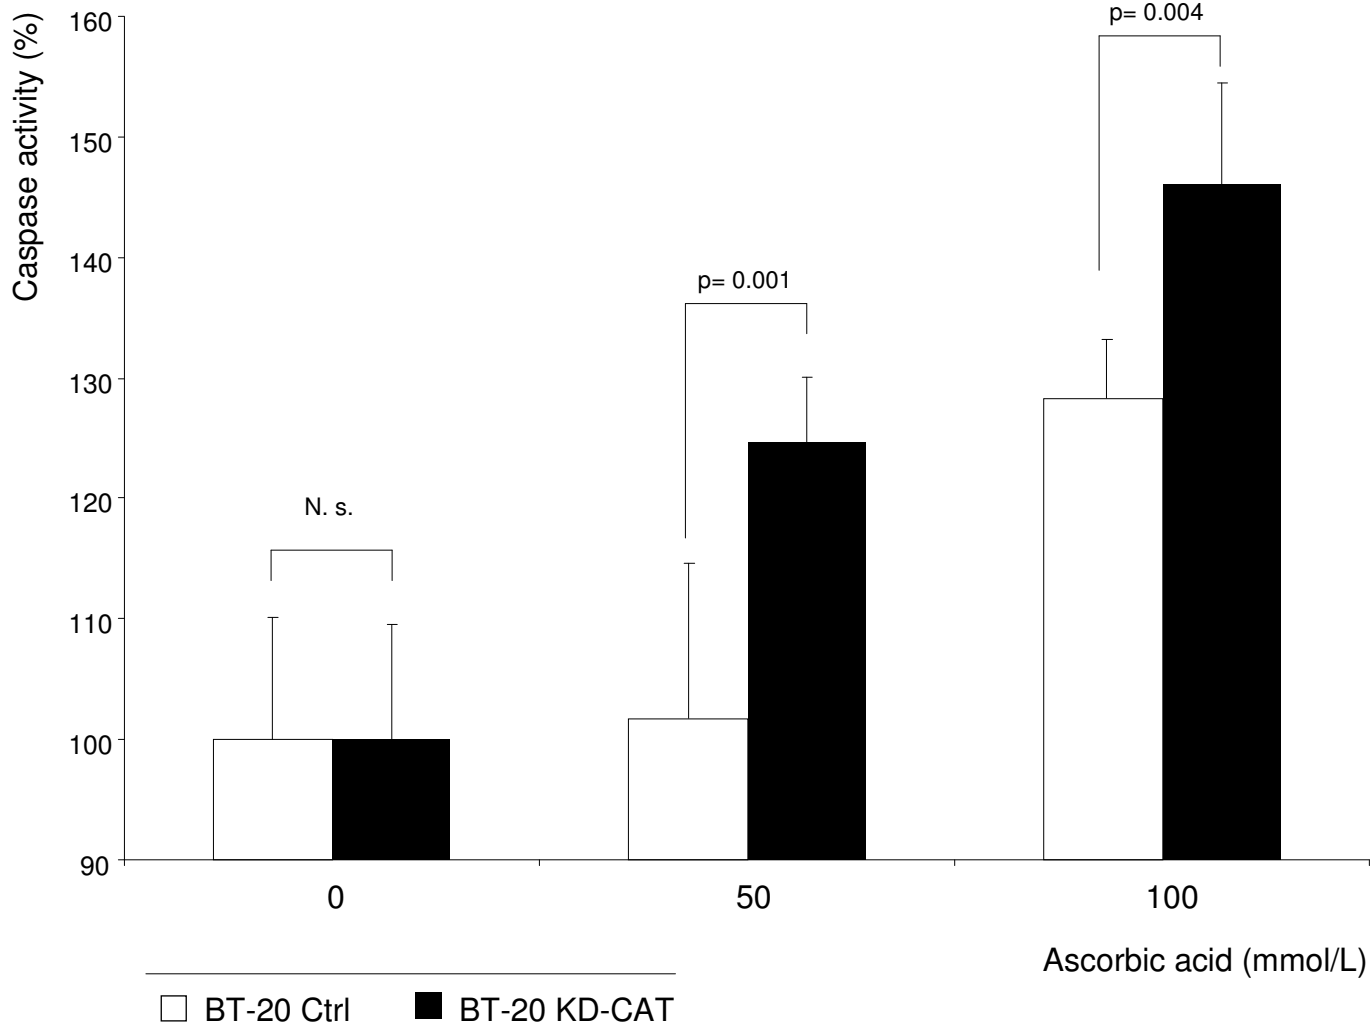

Supplement: 12906_2011_1044_MOESM8_ESM.pdf [file 12906_2011_1044_MOESM8_ESM.pdf]
